# Supplementary material for: Role of KCNB1 in the prognosis of gliomas and autophagy modulation
Source: PubMed Central journal article supplement (PMC5428316; doi:10.1038/s41598-017-00045-7), 2017-02-08

## **Title page**

### **Role of KCNB1 in the prognosis of gliomas and autophagy modulation**

**Hao-Yuan Wang:** Department of Neurosurgery, Zhujiang Hospital, Southern Medical University, Guangzhou, China, **email:**461251096@qq.com

**Wen Wang:** Department of Neurosurgery, Beijing Tiantan Hospital, Capital Medical University, Beijing, China, **email:** 675344815@qq.com

**Yan-Wei Liu:** Department of Neurosurgery, Beijing Tiantan Hospital, Capital Medical University, Beijing, China, **email:** liuyanwei\_tiantan@163.com

**Ming-Yang Li:** Beijing Neurosurgical Institute, Capital Medical University, Beijing, China, **email:** 764988115@qq.com

**Ting-Yu Liang:** Beijing Neurosurgical Institute, Capital Medical University, Beijing, China, **email:** Liangtingyutty@126.com

**Ji-Ye Li:** Beijing Neurosurgical Institute, Capital Medical University, Beijing, China, **email:** lijiyetty@126.com

**Hui-Min Hu:** Beijing Neurosurgical Institute, Capital Medical University, Beijing, China, **email:** [huhuimintty@126.com](mailto:huhuimintty@126.com)

**Yang Lu:** Department of Neurosurgery, Zhujiang Hospital, Southern Medical University, Guangzhou, China, **email:** runminlyck@126.com

**Chen Yao:** Department of Neurosurgery, Zhujiang Hospital, Southern

Medical University, Guangzhou, China, email: [405570491@qq.com](mailto:405570491@qq.com)

**Yong-Yi Ye:** Department of Neurosurgery, Zhujiang Hospital, Southern Medical University, Guangzhou, China, email: [793834516@qq.com](mailto:793834516@qq.com)

**Yong-Zhi Wang:** Department of Neurosurgery, Beijing Tiantan Hospital, Capital Medical University, Beijing, China, **email:** [wyz232@163.com](mailto:wyz232@163.com)

**Shi-Zhong Zhang:** Department of Neurosurgery, Zhujiang Hospital, Southern Medical University, Guangzhou, China, **email:** [shizhong\\_zh@163.com](mailto:shizhong_zh@163.com)

**Running Title:** Role of KCNB1 in the prognosis of gliomas

#### **Competing interests**

The authors declare no conflict of interest.

**Total numbers of Figures and Tables:** Five figures, one table, two supplementary figures and one supplementary table.

#### **Correspondence Authors:**

**Yong-Zhi Wang:** Department of Neurosurgery, Beijing Tiantan Hospital, Capital Medical University, No. 6 TiantanXili, Dongcheng District, Beijing 100050, China, Tel.: +86 10 67098431; fax: +86 10 67098431.

**Shi-Zhong Zhang:** Department of Neurosurgery, Zhujiang Hospital, Southern Medical University, 253# Gongye Road, Guangzhou, China, Tel.: +86 10 62782759; fax: +86 10 62782759.

## Table S1. Ion channel genes involved in this study

| <i>Gene symbol</i> | Gene title                                                     | Channel type                       |
|--------------------|----------------------------------------------------------------|------------------------------------|
| <i>ANO1</i>        | anoctamin 1, Calcium activated chloride channel                | Calcium activated chloride channel |
| <i>ANO2</i>        | anoctamin 2, Calcium activated chloride channel                | Calcium activated chloride channel |
| <i>CACNA1A</i>     | calcium channel, voltage-dependent, P/Q type, alpha 1A subunit | Voltage-gated calcium channels     |
| <i>CACNA1B</i>     | calcium channel, voltage-dependent, N type, alpha 1B subunit   | Voltage-gated calcium channels     |
| <i>CACNA1C</i>     | calcium channel, voltage-dependent, L type, alpha 1C subunit   | Voltage-gated calcium channels     |
| <i>CACNA1D</i>     | calcium channel, voltage-dependent, L type, alpha 1D subunit   | Voltage-gated calcium channels     |
| <i>CACNA1E</i>     | calcium channel, voltage-dependent, R type, alpha 1E subunit   | Voltage-gated calcium channels     |
| <i>CACNA1F</i>     | calcium channel, voltage-dependent, L type, alpha 1F subunit   | Voltage-gated calcium channels     |
| <i>CACNA1G</i>     | calcium channel, voltage-dependent, T type, alpha 1G subunit   | Voltage-gated calcium channels     |
| <i>CACNA1H</i>     | calcium channel, voltage-dependent, T type, alpha 1H subunit   | Voltage-gated calcium channels     |
| <i>CACNA1I</i>     | calcium channel, voltage-dependent, T type, alpha 1I subunit   | Voltage-gated calcium channels     |
| <i>CACNA1S</i>     | calcium channel, voltage-dependent, L type, alpha 1S subunit   | Voltage-gated calcium channels     |
| <i>CACNA2D1</i>    | calcium channel, voltage-dependent, alpha 2/delta subunit 1    | Voltage-gated calcium channels     |
| <i>CACNA2D2</i>    | calcium channel, voltage-dependent, alpha 2/delta subunit 2    | Voltage-gated calcium channels     |
| <i>CACNA2D3</i>    | calcium channel, voltage-dependent, alpha 2/delta subunit 3    | Voltage-gated calcium channels     |
| <i>CACNA2D4</i>    | calcium channel, voltage-dependent, alpha 2/delta subunit 4    | Voltage-gated calcium channels     |
| <i>CACNB1</i>      | calcium channel, voltage-dependent, beta 1 subunit             | Voltage-gated calcium channels     |
| <i>CACNB2</i>      | calcium channel, voltage-dependent, beta 2 subunit             | Voltage-gated calcium channels     |
| <i>CACNB3</i>      | calcium channel, voltage-dependent, beta 3 subunit             | Voltage-gated calcium channels     |
| <i>CACNB4</i>      | calcium channel, voltage-dependent, beta 4 subunit             | Voltage-gated calcium channels     |
| <i>CACNG1</i>      | calcium channel, voltage-dependent, gamma subunit 1            | Voltage-gated calcium channels     |
| <i>CACNG2</i>      | calcium channel, voltage-dependent, gamma subunit 2            | Voltage-gated calcium channels     |
| <i>CACNG3</i>      | calcium channel, voltage-dependent, gamma subunit 3            | Voltage-gated calcium channels     |
| <i>CACNG4</i>      | calcium channel, voltage-dependent, gamma subunit 4            | Voltage-gated calcium channels     |
| <i>CACNG5</i>      | calcium channel, voltage-dependent, gamma subunit 5            | Voltage-gated calcium channels     |
| <i>CACNG6</i>      | calcium channel, voltage-dependent, gamma subunit 6            | Voltage-gated calcium channels     |
| <i>CACNG7</i>      | calcium channel, voltage-dependent, gamma subunit 7            | Voltage-gated calcium channels     |
| <i>CACNG8</i>      | calcium channel, voltage-dependent, gamma subunit 8            | Voltage-gated calcium channels     |
| <i>CATSPER1</i>    | cation channel, sperm associated 1                             | CatSper and Two-Pore channels      |
| <i>CATSPER2</i>    | cation channel, sperm associated 2                             | CatSper and Two-Pore channels      |
| <i>CATSPER3</i>    | cation channel, sperm associated 3                             | CatSper and Two-Pore channels      |
| <i>CATSPER4</i>    | cation channel, sperm associated 4                             | CatSper and Two-Pore channels      |
| <i>CATSPERB</i>    | catsper channel auxiliary subunit beta                         | CatSper and Two-Pore channels      |
| <i>CATSPERD</i>    | catsper channel auxiliary subunit delta                        | CatSper and Two-Pore channels      |
| <i>CATSPERG</i>    | catsper channel auxiliary subunit gamma                        | CatSper and Two-Pore channels      |
| <i>CHRNA1</i>      | cholinergic receptor, nicotinic, alpha 1 (muscle)              | Nicotinic acetylcholine receptors  |
| <i>CHRNA10</i>     | cholinergic receptor, nicotinic, alpha 10 (neuronal)           | Nicotinic acetylcholine receptors  |
| <i>CHRNA2</i>      | cholinergic receptor, nicotinic, alpha 2 (neuronal)            | Nicotinic acetylcholine receptors  |
| <i>CHRNA3</i>      | cholinergic receptor, nicotinic, alpha 3 (neuronal)            | Nicotinic acetylcholine receptors  |
| <i>CHRNA4</i>      | cholinergic receptor, nicotinic, alpha 4 (neuronal)            | Nicotinic acetylcholine receptors  |
| <i>CHRNA5</i>      | cholinergic receptor, nicotinic, alpha 5 (neuronal)            | Nicotinic acetylcholine receptors  |

---

|                |                                                     |                                      |
|----------------|-----------------------------------------------------|--------------------------------------|
| <i>CHRNA6</i>  | cholinergic receptor, nicotinic, alpha 6 (neuronal) | Nicotinic acetylcholine receptors    |
| <i>CHRNA7</i>  | cholinergic receptor, nicotinic, alpha 7 (neuronal) | Nicotinic acetylcholine receptors    |
| <i>CHRNA9</i>  | cholinergic receptor, nicotinic, alpha 9 (neuronal) | Nicotinic acetylcholine receptors    |
| <i>CHRNB1</i>  | cholinergic receptor, nicotinic, beta 1 (muscle)    | Nicotinic acetylcholine receptors    |
| <i>CHRNB2</i>  | cholinergic receptor, nicotinic, beta 2 (neuronal)  | Nicotinic acetylcholine receptors    |
| <i>CHRNB3</i>  | cholinergic receptor, nicotinic, beta 3 (neuronal)  | Nicotinic acetylcholine receptors    |
| <i>CHRNB4</i>  | cholinergic receptor, nicotinic, beta 4 (neuronal)  | Nicotinic acetylcholine receptors    |
| <i>CHRNA6</i>  | cholinergic receptor, nicotinic, delta (muscle)     | Nicotinic acetylcholine receptors    |
| <i>CHRNA6</i>  | cholinergic receptor, nicotinic, epsilon (muscle)   | Nicotinic acetylcholine receptors    |
| <i>CHRNA6</i>  | cholinergic receptor, nicotinic, gamma (muscle)     | Nicotinic acetylcholine receptors    |
| <i>CLCA1</i>   | chloride channel accessory 1                        | Calcium activated chloride channel   |
| <i>CLCA2</i>   | chloride channel accessory 2                        | Calcium activated chloride channel   |
| <i>CLCA3</i>   | chloride channel accessory 3                        | Calcium activated chloride channel   |
| <i>CLCC1</i>   | chloride channel CLIC-like 1                        | Mid-1-related chloride channel       |
| <i>CLCN1</i>   | chloride channel, voltage-sensitive 1               | Voltage-sensitive chloride channel   |
| <i>CLCN2</i>   | chloride channel, voltage-sensitive 2               | Voltage-sensitive chloride channel   |
| <i>CLCN3</i>   | chloride channel, voltage-sensitive 3               | Voltage-sensitive chloride channel   |
| <i>CLCN4</i>   | chloride channel, voltage-sensitive 4               | Voltage-sensitive chloride channel   |
| <i>CLCN5</i>   | chloride channel, voltage-sensitive 5               | Voltage-sensitive chloride channel   |
| <i>CLCN6</i>   | chloride channel, voltage-sensitive 6               | Voltage-sensitive chloride channel   |
| <i>CLCN7</i>   | chloride channel, voltage-sensitive 7               | Voltage-sensitive chloride channel   |
| <i>CLCNKA</i>  | chloride channel, voltage-sensitive Ka              | Voltage-sensitive chloride channel   |
| <i>CLCNKB</i>  | chloride channel, voltage-sensitive Kb              | Voltage-sensitive chloride channel   |
| <i>CLIC1</i>   | chloride intracellular channel 1                    | Chloride intracellular channel       |
| <i>CLIC2</i>   | chloride intracellular channel 2                    | Chloride intracellular channel       |
| <i>CLIC3</i>   | chloride intracellular channel 3                    | Chloride intracellular channel       |
| <i>CLIC4</i>   | chloride intracellular channel 4                    | Chloride intracellular channel       |
| <i>CLIC5</i>   | chloride intracellular channel 5                    | Chloride intracellular channel       |
| <i>CLIC6</i>   | chloride intracellular channel 6                    | Chloride intracellular channel       |
| <i>CNGA1</i>   | cyclic nucleotide gated channel alpha 1             | Cyclic nucleotide-regulated channels |
| <i>CNGA2</i>   | cyclic nucleotide gated channel alpha 2             | Cyclic nucleotide-regulated channels |
| <i>CNGA3</i>   | cyclic nucleotide gated channel alpha 3             | Cyclic nucleotide-regulated channels |
| <i>CNGA4</i>   | cyclic nucleotide gated channel alpha 4             | Cyclic nucleotide-regulated channels |
| <i>CNGB1</i>   | cyclic nucleotide gated channel beta 1 C            | yclic nucleotide-regulated channels  |
| <i>CNGB3</i>   | cyclic nucleotide gated channel beta 3 C            | yclic nucleotide-regulated channels  |
| <i>GABARAP</i> | GABA(A) receptor-associated protein                 | GABAA receptors                      |
| <i>GABRA1</i>  | gamma-aminobutyric acid (GABA) A receptor, alpha 1  | GABAA receptors                      |
| <i>GABRA2</i>  | gamma-aminobutyric acid (GABA) A receptor, alpha 2  | GABAA receptors                      |
| <i>GABRA3</i>  | gamma-aminobutyric acid (GABA) A receptor, alpha 3  | GABAA receptors                      |
| <i>GABRA4</i>  | gamma-aminobutyric acid (GABA) A receptor, alpha 4  | GABAA receptors                      |
| <i>GABRA5</i>  | gamma-aminobutyric acid (GABA) A receptor, alpha 5  | GABAA receptors                      |
| <i>GABRA6</i>  | gamma-aminobutyric acid (GABA) A receptor, alpha 6  | GABAA receptors                      |
| <i>GABRB1</i>  | gamma-aminobutyric acid (GABA) A receptor, beta 1 G | ABAA receptors                       |
| <i>GABRB2</i>  | gamma-aminobutyric acid (GABA) A receptor, beta 2 G | ABAA receptors                       |

---

---

|               |                                                                         |                                      |
|---------------|-------------------------------------------------------------------------|--------------------------------------|
| <i>GABRB3</i> | gamma-aminobutyric acid (GABA) A receptor, beta 3 G                     | ABAA receptors                       |
| <i>GABRD</i>  | gamma-aminobutyric acid (GABA) A receptor, delta GA                     | BAA receptors                        |
| <i>GABRE</i>  | gamma-aminobutyric acid (GABA) A receptor, epsilon                      | GABAA receptors                      |
| <i>GABRG1</i> | gamma-aminobutyric acid (GABA) A receptor, gamma 1                      | GABAA receptors                      |
| <i>GABRG2</i> | gamma-aminobutyric acid (GABA) A receptor, gamma 2                      | GABAA receptors                      |
| <i>GABRG3</i> | gamma-aminobutyric acid (GABA) A receptor, gamma 3                      | GABAA receptors                      |
| <i>GABRP</i>  | gamma-aminobutyric acid (GABA) A receptor, pi                           | GABAA receptors                      |
| <i>GABRQ</i>  | gamma-aminobutyric acid (GABA) A receptor, theta                        | GABAA receptors                      |
| <i>GABRR1</i> | gamma-aminobutyric acid (GABA) A receptor, rho 1                        | GABAA receptors                      |
| <i>GABRR2</i> | gamma-aminobutyric acid (GABA) A receptor, rho 2                        | GABAA receptors                      |
| <i>GABRR3</i> | gamma-aminobutyric acid (GABA) A receptor, rho 3                        | GABAA receptors                      |
| <i>GLRA1</i>  | glycine receptor, alpha 1                                               | Glycine receptors                    |
| <i>GLRA2</i>  | glycine receptor, alpha 2                                               | Glycine receptors                    |
| <i>GLRA3</i>  | glycine receptor, alpha 3                                               | Glycine receptors                    |
| <i>GLRA4</i>  | glycine receptor, alpha 4                                               | Glycine receptors                    |
| <i>GLRB</i>   | glycine receptor, beta                                                  | Glycine receptors                    |
| <i>GRIA1</i>  | glutamate receptor, ionotropic, AMPA 1                                  | Ionotropic glutamate receptors       |
| <i>GRIA2</i>  | glutamate receptor, ionotropic, AMPA 2                                  | Ionotropic glutamate receptors       |
| <i>GRIA3</i>  | glutamate receptor, ionotropic, AMPA 3                                  | Ionotropic glutamate receptors       |
| <i>GRIA4</i>  | glutamate receptor, ionotropic, AMPA 4                                  | Ionotropic glutamate receptors       |
| <i>GRID1</i>  | glutamate receptor, ionotropic, delta 1                                 | Ionotropic glutamate receptors       |
| <i>GRID2</i>  | glutamate receptor, ionotropic, delta 2                                 | Ionotropic glutamate receptors       |
| <i>GRIK1</i>  | glutamate receptor, ionotropic, kainate 1                               | Ionotropic glutamate receptors       |
| <i>GRIK2</i>  | glutamate receptor, ionotropic, kainate 2                               | Ionotropic glutamate receptors       |
| <i>GRIK3</i>  | glutamate receptor, ionotropic, kainate 3                               | Ionotropic glutamate receptors       |
| <i>GRIK4</i>  | glutamate receptor, ionotropic, kainate 4                               | Ionotropic glutamate receptors       |
| <i>GRIK5</i>  | glutamate receptor, ionotropic, kainate 5                               | Ionotropic glutamate receptors       |
| <i>GRIN1</i>  | glutamate receptor, ionotropic, N-methyl D-aspartate 1                  | Ionotropic glutamate receptors       |
| <i>GRIN2A</i> | glutamate receptor, ionotropic, N-methyl D-aspartate 2A                 | Ionotropic glutamate receptors       |
| <i>GRIN2B</i> | glutamate receptor, ionotropic, N-methyl D-aspartate 2B                 | Ionotropic glutamate receptors       |
| <i>GRIN2C</i> | glutamate receptor, ionotropic, N-methyl D-aspartate 2C                 | Ionotropic glutamate receptors       |
| <i>GRIN2D</i> | glutamate receptor, ionotropic, N-methyl D-aspartate 2D                 | Ionotropic glutamate receptors       |
| <i>GRIN3A</i> | glutamate receptor, ionotropic, N-methyl-D-aspartate 3A                 | Ionotropic glutamate receptors       |
| <i>GRIN3B</i> | glutamate receptor, ionotropic, N-methyl-D-aspartate 3B                 | Ionotropic glutamate receptors       |
| <i>HCN1</i>   | hyperpolarization activated cyclic nucleotide-gated potassium channel 1 | Cyclic nucleotide-regulated channels |
| <i>HCN2</i>   | hyperpolarization activated cyclic nucleotide-gated potassium channel 1 | Cyclic nucleotide-regulated channels |
| <i>HCN3</i>   | hyperpolarization activated cyclic nucleotide-gated potassium channel 1 | Cyclic nucleotide-regulated channels |
| <i>HCN4</i>   | hyperpolarization activated cyclic nucleotide-gated potassium channel 1 | Cyclic nucleotide-regulated channels |
| <i>HTR3A</i>  | 5-hydroxytryptamine (serotonin) receptor 3A,                            | ionotropic 5-HT3 receptors           |
| <i>HTR3B</i>  | 5-hydroxytryptamine (serotonin) receptor 3B,                            | ionotropic 5-HT3 receptors           |
| <i>HTR3C</i>  | 5-hydroxytryptamine (serotonin) receptor 3C,                            | ionotropic 5-HT3 receptors           |
| <i>HTR3D</i>  | 5-hydroxytryptamine (serotonin) receptor 3D,                            | ionotropic 5-HT3 receptors           |
| <i>HTR3E</i>  | 5-hydroxytryptamine (serotonin) receptor 3E,                            | ionotropic 5-HT3 receptors           |
| <i>HVCN1</i>  | hydrogen voltage-gated channel 1                                        | Voltage-gated proton channel         |

---



---

|               |                                                                                          |                                        |
|---------------|------------------------------------------------------------------------------------------|----------------------------------------|
| <i>KCNH7</i>  | potassium voltage-gated channel, subfamily H (eagrelated), member 7                      | Voltage-gated potassium channels       |
| <i>KCNH8</i>  | potassium voltage-gated channel, subfamily H (eagrelated), member 8                      | Voltage-gated potassium channels       |
| <i>KCNJ1</i>  | potassium inwardly-rectifying channel, subfamily J, member 1                             | Inwardly rectifying potassium channels |
| <i>KCNJ10</i> | potassium inwardly-rectifying channel, subfamily J, member 10                            | Inwardly rectifying potassium channels |
| <i>KCNJ11</i> | potassium inwardly-rectifying channel, subfamily J, member 11                            | Inwardly rectifying potassium channels |
| <i>KCNJ12</i> | potassium inwardly-rectifying channel, subfamily J, member 12                            | Inwardly rectifying potassium channels |
| <i>KCNJ13</i> | potassium inwardly-rectifying channel, subfamily J, member 13                            | Inwardly rectifying potassium channels |
| <i>KCNJ14</i> | potassium inwardly-rectifying channel, subfamily J, member 14                            | Inwardly rectifying potassium channels |
| <i>KCNJ15</i> | potassium inwardly-rectifying channel, subfamily J, member 15                            | Inwardly rectifying potassium channels |
| <i>KCNJ16</i> | potassium inwardly-rectifying channel, subfamily J, member 16                            | Inwardly rectifying potassium channels |
| <i>KCNJ18</i> | potassium inwardly-rectifying channel, subfamily J, member 18                            | Inwardly rectifying potassium channels |
| <i>KCNJ2</i>  | potassium inwardly-rectifying channel, subfamily J, member 2                             | Inwardly rectifying potassium channels |
| <i>KCNJ3</i>  | potassium inwardly-rectifying channel, subfamily J, member 3                             | Inwardly rectifying potassium channels |
| <i>KCNJ4</i>  | potassium inwardly-rectifying channel, subfamily J, member 4                             | Inwardly rectifying potassium channels |
| <i>KCNJ5</i>  | potassium inwardly-rectifying channel, subfamily J, member 5                             | Inwardly rectifying potassium channels |
| <i>KCNJ6</i>  | potassium inwardly-rectifying channel, subfamily J, member 6                             | Inwardly rectifying potassium channels |
| <i>KCNJ8</i>  | potassium inwardly-rectifying channel, subfamily J, member 8                             | Inwardly rectifying potassium channels |
| <i>KCNJ9</i>  | potassium inwardly-rectifying channel, subfamily J, member 9                             | Inwardly rectifying potassium channels |
| <i>KCNK1</i>  | potassium channel, subfamily K, member 1                                                 | Two-P potassium channels               |
| <i>KCNK10</i> | potassium channel, subfamily K, member 10                                                | Two-P potassium channels               |
| <i>KCNK12</i> | potassium channel, subfamily K, member 12                                                | Two-P potassium channels               |
| <i>KCNK13</i> | potassium channel, subfamily K, member 13                                                | Two-P potassium channels               |
| <i>KCNK15</i> | potassium channel, subfamily K, member 15                                                | Two-P potassium channels               |
| <i>KCNK16</i> | potassium channel, subfamily K, member 16                                                | Two-P potassium channels               |
| <i>KCNK17</i> | potassium channel, subfamily K, member 17                                                | Two-P potassium channels               |
| <i>KCNK18</i> | potassium channel, subfamily K, member 18                                                | Two-P potassium channels               |
| <i>KCNK2</i>  | potassium channel, subfamily K, member 2                                                 | Two-P potassium channels               |
| <i>KCNK3</i>  | potassium channel, subfamily K, member 3                                                 | Two-P potassium channels               |
| <i>KCNK4</i>  | potassium channel, subfamily K, member 4                                                 | Two-P potassium channels               |
| <i>KCNK5</i>  | potassium channel, subfamily K, member 5                                                 | Two-P potassium channels               |
| <i>KCNK6</i>  | potassium channel, subfamily K, member 6                                                 | Two-P potassium channels               |
| <i>KCNK7</i>  | potassium channel, subfamily K, member 7                                                 | Two-P potassium channels               |
| <i>KCNK9</i>  | potassium channel, subfamily K, member 9                                                 | Two-P potassium channels               |
| <i>KCNMA1</i> | potassium large conductance calcium-activated channel, subfamily M, alpha member 1       | Calcium-activated potassium channels   |
| <i>KCNMB1</i> | potassium large conductance calcium-activated channel, subfamily M, beta member 1        | Calcium-activated potassium channels   |
| <i>KCNMB2</i> | potassium large conductance calcium-activated channel, subfamily M, beta member 2        | Calcium-activated potassium channels   |
| <i>KCNMB3</i> | potassium large conductance calcium-activated channel, subfamily M, beta member 3        | Calcium-activated potassium channels   |
| <i>KCNMB4</i> | potassium large conductance calcium-activated channel, subfamily M, beta member 4        | Calcium-activated potassium channels   |
| <i>KCNN1</i>  | potassium intermediate/small conductance calciumactivated channel, subfamily N, member 1 | Calcium-activated potassium channels   |
| <i>KCNN2</i>  | potassium intermediate/small conductance calciumactivated channel, subfamily N, member 2 | Calcium-activated potassium channels   |
| <i>KCNN3</i>  | potassium intermediate/small conductance calciumactivated channel, subfamily N, member 3 | Calcium-activated potassium channels   |

---

|               |                                                                                          |                                       |
|---------------|------------------------------------------------------------------------------------------|---------------------------------------|
| <i>KCNN4</i>  | potassium intermediate/small conductance calciumactivated channel, subfamily N, member 4 | Calcium-activated potassium channels  |
| <i>KCNQ1</i>  | potassium voltage-gated channel, KQT-like subfamily, member 1                            | Voltage-gated potassium channels      |
| <i>KCNQ2</i>  | potassium voltage-gated channel, KQT-like subfamily, member 2                            | Voltage-gated potassium channels      |
| <i>KCNQ3</i>  | potassium voltage-gated channel, KQT-like subfamily, member 3                            | Voltage-gated potassium channels      |
| <i>KCNQ4</i>  | potassium voltage-gated channel, KQT-like subfamily, member 4                            | Voltage-gated potassium channels      |
| <i>KCNQ5</i>  | potassium voltage-gated channel, KQT-like subfamily, member 5                            | Voltage-gated potassium channels      |
| <i>KCN51</i>  | potassium voltage-gated channel, delayed-rectifier, subfamily S, member 1                | Voltage-gated potassium channels      |
| <i>KCN52</i>  | potassium voltage-gated channel, delayed-rectifier, subfamily S, member 2                | Voltage-gated potassium channels      |
| <i>KCN53</i>  | potassium voltage-gated channel, delayed-rectifier, subfamily S, member 3                | Voltage-gated potassium channels      |
| <i>KCNT1</i>  | potassium channel, subfamily T, member 1                                                 | Calcium-activated potassium channels  |
| <i>KCNT2</i>  | potassium channel, subfamily T, member 2                                                 | Calcium-activated potassium channels  |
| <i>KCNU1</i>  | potassium channel, subfamily U, member 1                                                 | Calcium-activated potassium channels  |
| <i>KCNV1</i>  | potassium channel, subfamily V, member 1                                                 | Voltage-gated potassium channels      |
| <i>KCNV2</i>  | potassium channel, subfamily V, member 2                                                 | Voltage-gated potassium channels      |
| <i>MCOLN1</i> | mucolipin 1                                                                              | Transient receptor potential channels |
| <i>MCOLN2</i> | mucolipin 2                                                                              | Transient receptor potential channels |
| <i>MCOLN3</i> | mucolipin 3                                                                              | Transient receptor potential channels |
| <i>NALCN</i>  | sodium leak channel, non-selective                                                       | Voltage-independent cation channels   |
| <i>P2RX1</i>  | purinergic receptor P2X, ligand-gated ion channel, 1                                     | P2X receptors                         |
| <i>P2RX2</i>  | purinergic receptor P2X, ligand-gated ion channel, 2                                     | P2X receptors                         |
| <i>P2RX3</i>  | purinergic receptor P2X, ligand-gated ion channel, 3                                     | P2X receptors                         |
| <i>P2RX4</i>  | purinergic receptor P2X, ligand-gated ion channel, 4                                     | P2X receptors                         |
| <i>P2RX5</i>  | purinergic receptor P2X, ligand-gated ion channel, 5                                     | P2X receptors                         |
| <i>P2RX6</i>  | purinergic receptor P2X, ligand-gated ion channel, 6                                     | P2X receptors                         |
| <i>P2RX7</i>  | purinergic receptor P2X, ligand-gated ion channel, 7                                     | P2X receptors                         |
| <i>PKD1</i>   | polycystic kidney disease 1 (autosomal dominant)                                         | Transient receptor potential channels |
| <i>PKD2</i>   | polycystic kidney disease 2 (autosomal dominant)                                         | Transient receptor potential channels |
| <i>PKD2L1</i> | polycystic kidney disease 2-like 1                                                       | Transient receptor potential channels |
| <i>PKD2L2</i> | polycystic kidney disease 2-like 2                                                       | Transient receptor potential channels |
| <i>SCN10A</i> | sodium channel, voltage-gated, type X, alpha subunit                                     | Voltage-gated sodium channels         |
| <i>SCN11A</i> | sodium channel, voltage-gated, type XI, alpha subunit                                    | Voltage-gated sodium channels         |
| <i>SCN1A</i>  | sodium channel, voltage-gated, type I, alpha subunit                                     | Voltage-gated sodium channels         |
| <i>SCN1B</i>  | sodium channel, voltage-gated, type I, beta subunit                                      | Voltage-gated sodium channels         |
| <i>SCN2A</i>  | sodium channel, voltage-gated, type II, alpha subunit                                    | Voltage-gated sodium channels         |
| <i>SCN2B</i>  | sodium channel, voltage-gated, type II, beta subunit                                     | Voltage-gated sodium channels         |
| <i>SCN3A</i>  | sodium channel, voltage-gated, type III, alpha subunit                                   | Voltage-gated sodium channels         |
| <i>SCN3B</i>  | sodium channel, voltage-gated, type III, beta subunit                                    | Voltage-gated sodium channels         |
| <i>SCN4A</i>  | sodium channel, voltage-gated, type IV, alpha subunit                                    | Voltage-gated sodium channels         |
| <i>SCN4B</i>  | sodium channel, voltage-gated, type IV, beta subunit                                     | Voltage-gated sodium channels         |
| <i>SCN5A</i>  | sodium channel, voltage-gated, type V, alpha subunit                                     | Voltage-gated sodium channels         |
| <i>SCN7A</i>  | sodium channel, voltage-gated, type VII, alpha subunit                                   | Voltage-gated sodium channels         |
| <i>SCN8A</i>  | sodium channel, voltage gated, type VIII, alpha subunit                                  | Voltage-gated sodium channels         |
| <i>SCN9A</i>  | sodium channel, voltage-gated, type IX, alpha subunit                                    | Voltage-gated sodium channels         |



|               |                                                                    |                                       |
|---------------|--------------------------------------------------------------------|---------------------------------------|
| <i>SCNN1A</i> | sodium channel, non-voltage-gated 1 alpha subunit                  | Nonvoltage-gated sodium channels      |
| <i>SCNN1B</i> | sodium channel, non-voltage-gated 1, beta subunit                  | Nonvoltage-gated sodium channels      |
| <i>SCNN1D</i> | sodium channel, non-voltage-gated 1, delta subunit                 | Nonvoltage-gated sodium channels      |
| <i>SCNN1G</i> | sodium channel, non-voltage-gated 1, gamma subunit                 | Nonvoltage-gated sodium channels      |
| <i>TPCN1</i>  | two pore segment channel 1                                         | CatSper and two-pore channels         |
| <i>TPCN2</i>  | two pore segment channel 2                                         | CatSper and two-pore channels         |
| <i>TRPA1</i>  | transient receptor potential cation channel, subfamily A, member 1 | Transient receptor potential channels |
| <i>TRPC1</i>  | transient receptor potential cation channel, subfamily C, member 1 | Transient receptor potential channels |
| <i>TRPC3</i>  | transient receptor potential cation channel, subfamily C, member 3 | Transient receptor potential channels |
| <i>TRPC4</i>  | transient receptor potential cation channel, subfamily C, member 4 | Transient receptor potential channels |
| <i>TRPC5</i>  | transient receptor potential cation channel, subfamily C, member 5 | Transient receptor potential channels |
| <i>TRPC6</i>  | transient receptor potential cation channel, subfamily C, member 6 | Transient receptor potential channels |
| <i>TRPC7</i>  | transient receptor potential cation channel, subfamily C, member 7 | Transient receptor potential channels |
| <i>TRPM1</i>  | transient receptor potential cation channel, subfamily M, member 1 | Transient receptor potential channels |
| <i>TRPM2</i>  | transient receptor potential cation channel, subfamily M, member 2 | Transient receptor potential channels |
| <i>TRPM3</i>  | transient receptor potential cation channel, subfamily M, member 3 | Transient receptor potential channels |
| <i>TRPM4</i>  | transient receptor potential cation channel, subfamily M, member 4 | Transient receptor potential channels |
| <i>TRPM5</i>  | transient receptor potential cation channel, subfamily M, member 5 | Transient receptor potential channels |
| <i>TRPM6</i>  | transient receptor potential cation channel, subfamily M, member 6 | Transient receptor potential channels |
| <i>TRPM7</i>  | transient receptor potential cation channel, subfamily M, member 7 | Transient receptor potential channels |
| <i>TRPM8</i>  | transient receptor potential cation channel, subfamily M, member 8 | Transient receptor potential channels |
| <i>TRPV1</i>  | transient receptor potential cation channel, subfamily V, member 1 | Transient receptor potential channels |
| <i>TRPV2</i>  | transient receptor potential cation channel, subfamily V, member 2 | Transient receptor potential channels |
| <i>TRPV3</i>  | transient receptor potential cation channel, subfamily V, member 3 | Transient receptor potential channels |
| <i>TRPV4</i>  | transient receptor potential cation channel, subfamily V, member 4 | Transient receptor potential channels |
| <i>TRPV5</i>  | transient receptor potential cation channel, subfamily V, member 5 | Transient receptor potential channels |
| <i>TRPV6</i>  | transient receptor potential cation channel, subfamily V, member 6 | Transient receptor potential channels |
| <i>VDAC1</i>  | voltage-dependent anion channel 1                                  | voltage-dependent anion channel       |
| <i>VDAC2</i>  | voltage-dependent anion channel 2                                  | voltage-dependent anion channel       |
| <i>VDAC3</i>  | voltage-dependent anion channel 3                                  | voltage-dependent anion channel       |
| <i>ZACN</i>   | zinc activated ligand-gated ion channel                            | ZAC                                   |

**Figure S1.** EX-T1882-Lv201 vectors for the transduction of the KCNB1 gene.

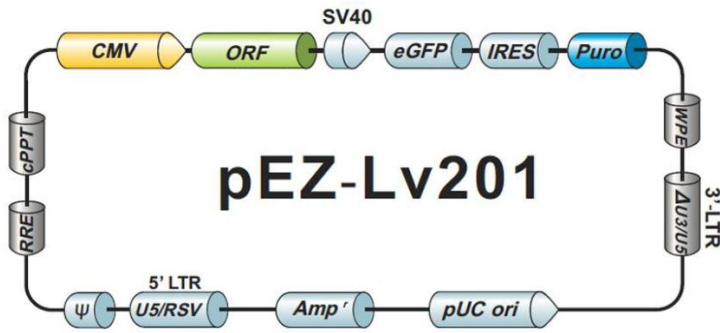

**Figure S2.** (A) Immunofluorescence of KCNB1+ (eGFP) cells. (B) Modulation of migration in U87MG and U118MG cells by KCNB1 transduction and its rescue by specific KCNB1 siRNA. *P* values were calculated with two-sided Student's *t* test. Scale bar, 25μm. \* *p* < 0.05.

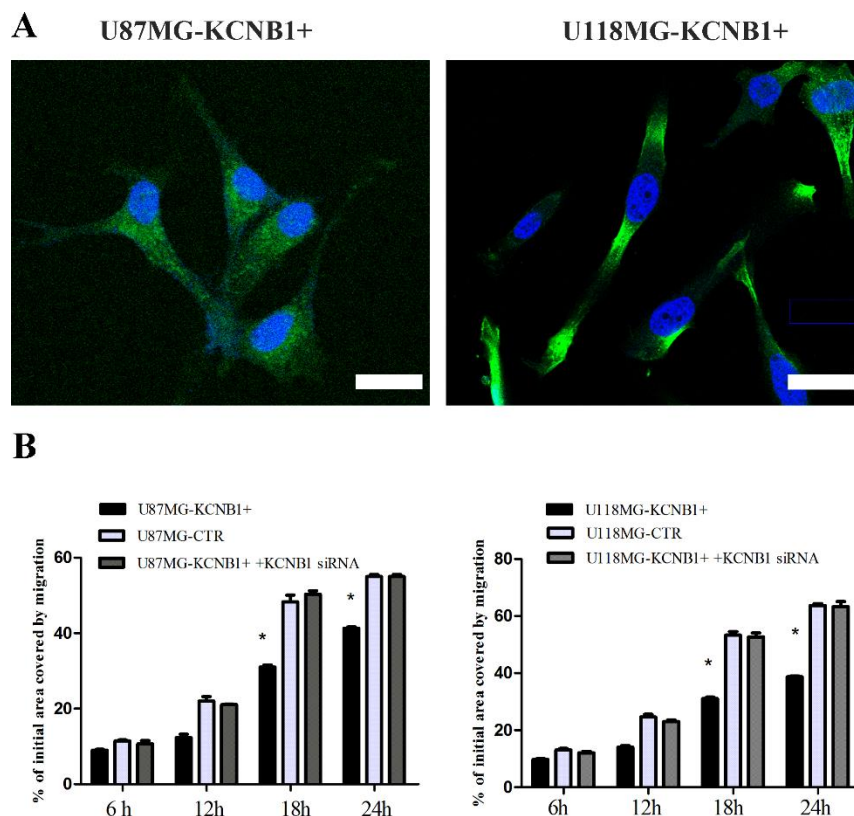

Supplement: 41598_2017_45_MOESM1_ESM.pdf [file 41598_2017_45_MOESM1_ESM.pdf]
